# Supplementary material for: Alkylsilyl-substituted benzodithiophene-based small molecules as promising hole-transport materials for perovskite solar cells
Source: Royal Society of Chemistry journal article supplement (doi:10.1039/d3se01617j), 2024-01-01
Supplement: d3se01617j1.pdf [file d3se01617j1.pdf]

## Electronic Supplementary Information

### **Alkylsilyl-Substituted Benzodithiophene-Based Small Molecules As Promising Hole-Transport Materials For Perovskite Solar Cells†**

M. E. Sideltsev, A. N. Zhivchikova, I. E. Kuznetsov, D. K. Sagdullina, M. M. Tepliakova, A. A. Piryazev, D. V. Anokhin, M. S. Maksimovich, N. G. Nikitenko, D. A. Ivanov, and A. V. Akkuratov

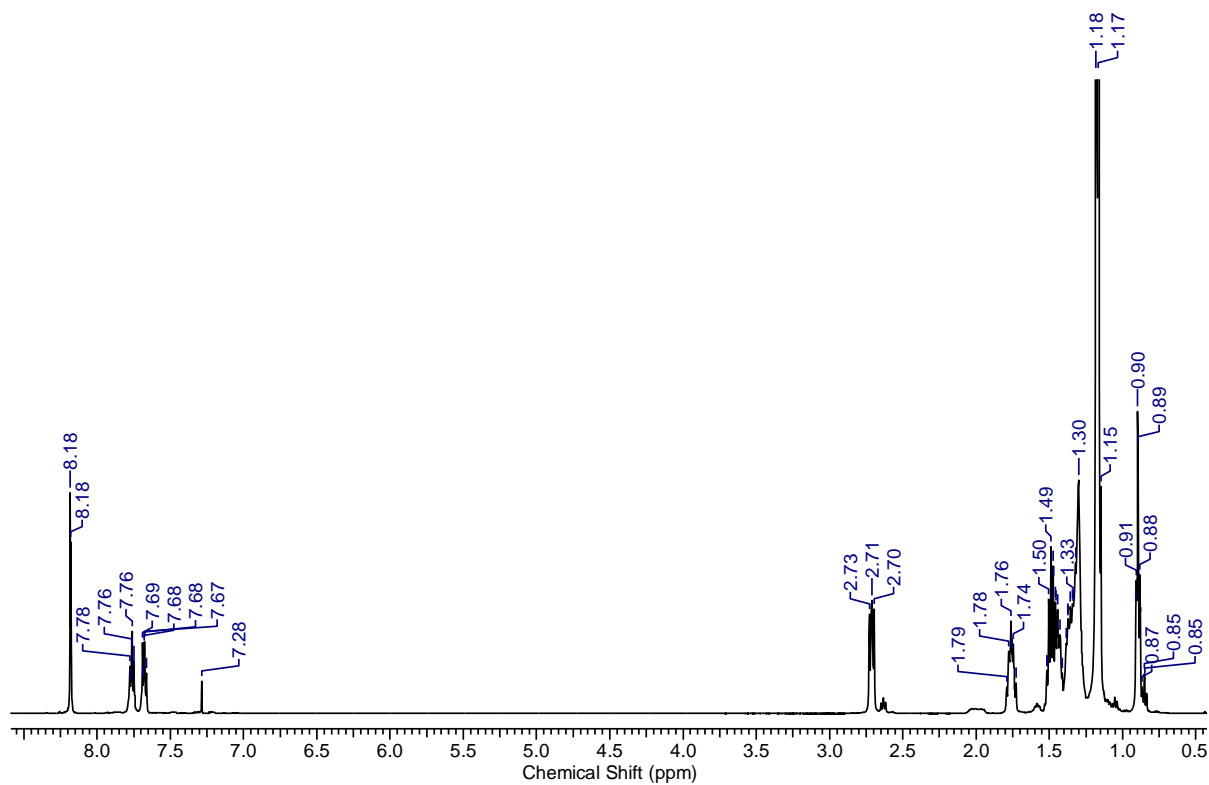

Figure S1.  $^1\text{H}$  NMR spectrum of compound **2**.

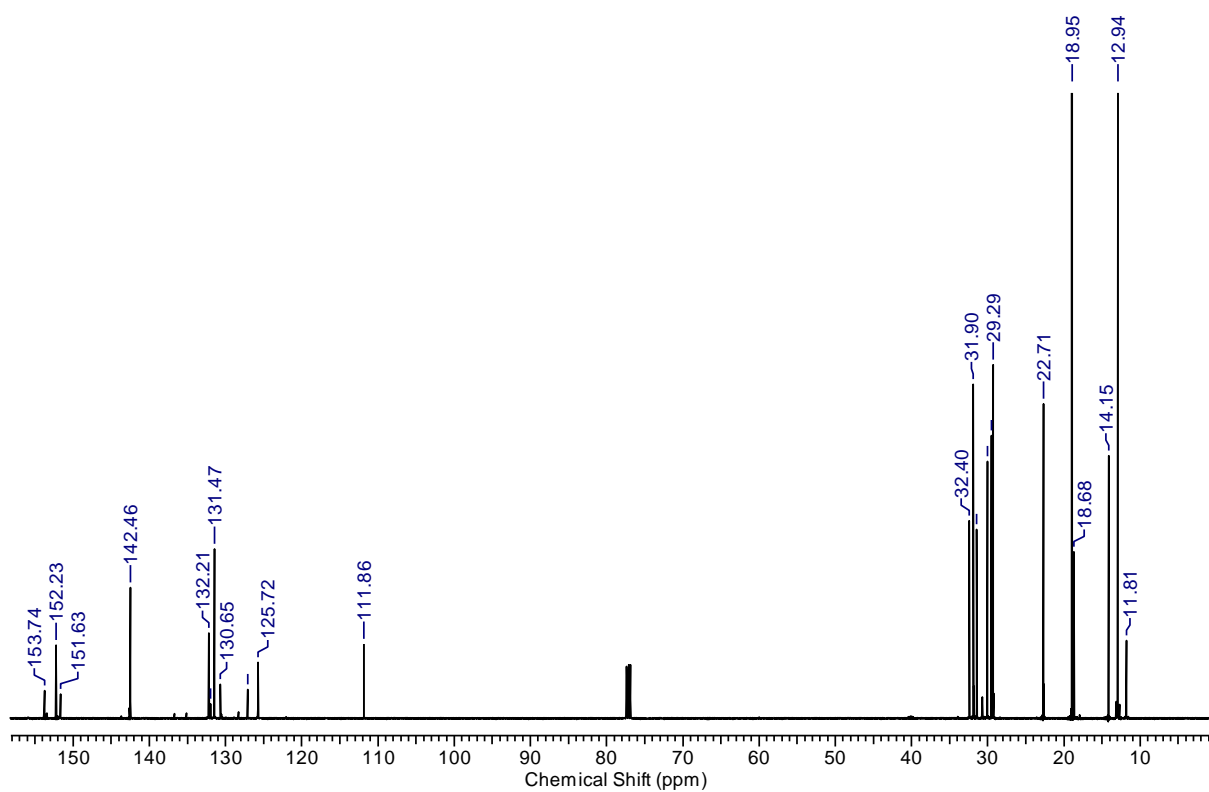

Figure S2.  $^{13}\text{C}$  NMR spectrum of compound **2**.

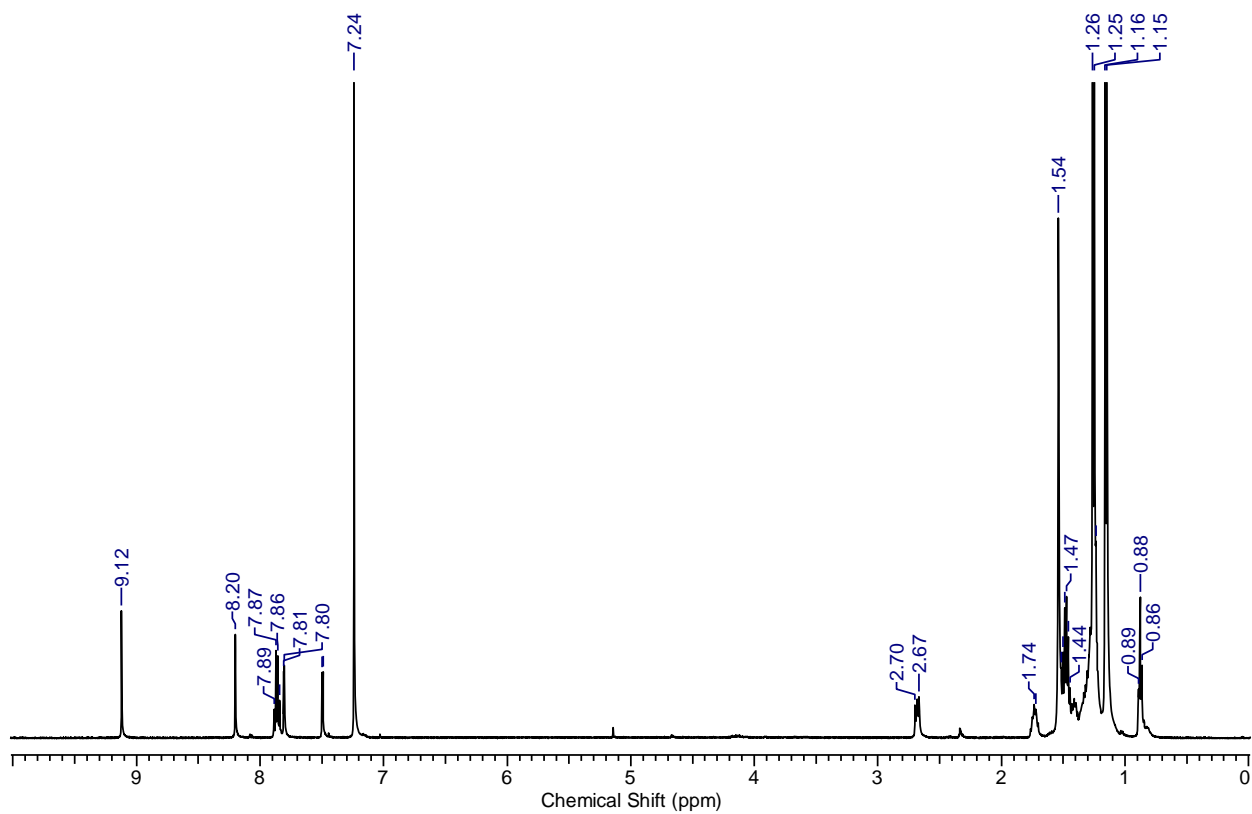

Figure S3.  $^1\text{H}$  NMR spectrum of **TB-Si<sub>3</sub>.3**.

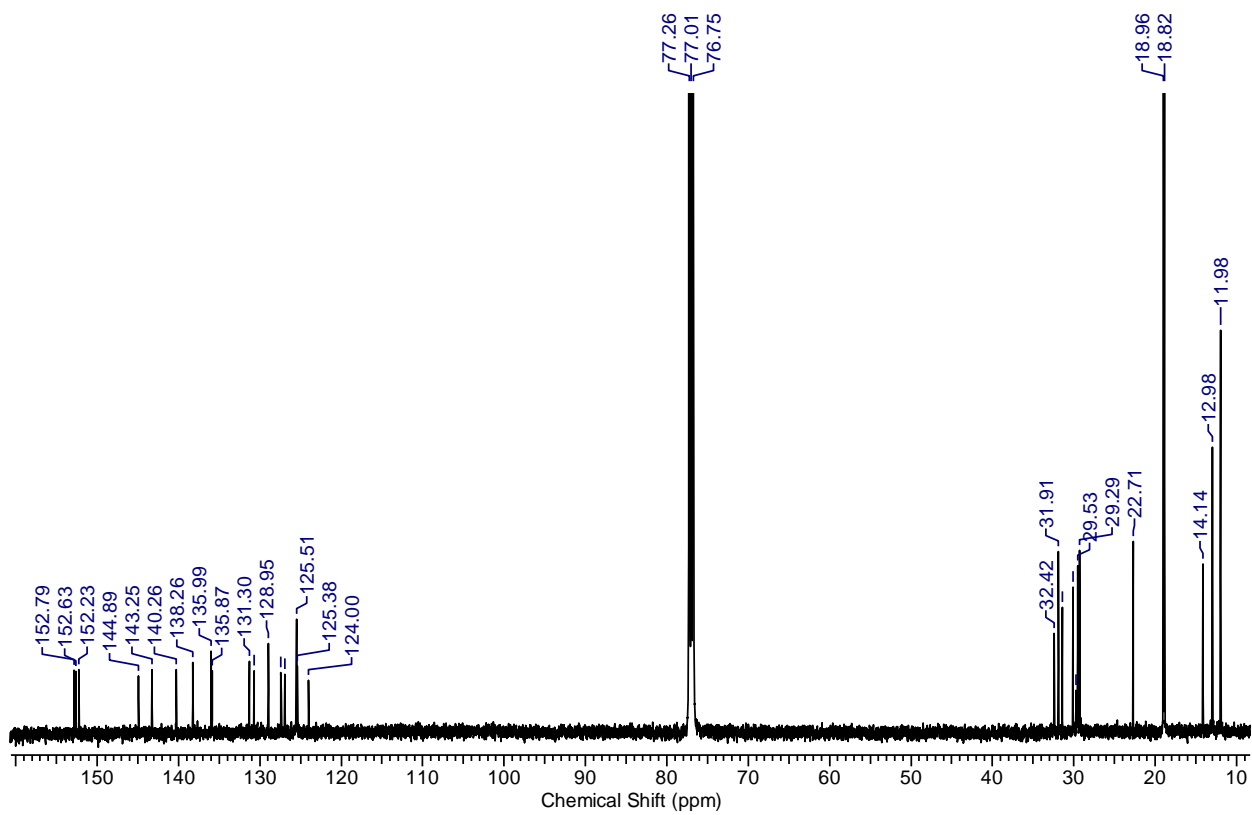

Figure S4.  $^{13}\text{C}$  NMR spectrum of **TB-Si<sub>3</sub>.3**.

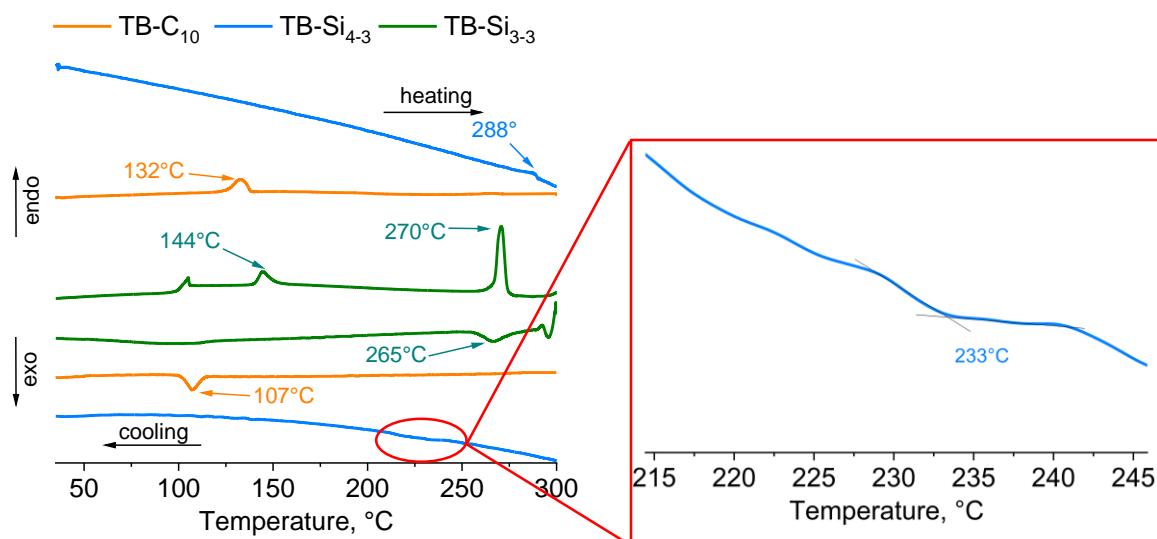

Figure S5. DSC plots for small molecules **TB-C<sub>10</sub>**, **TB-Si<sub>4-3</sub>**, and **TB-Si<sub>3-3</sub>**

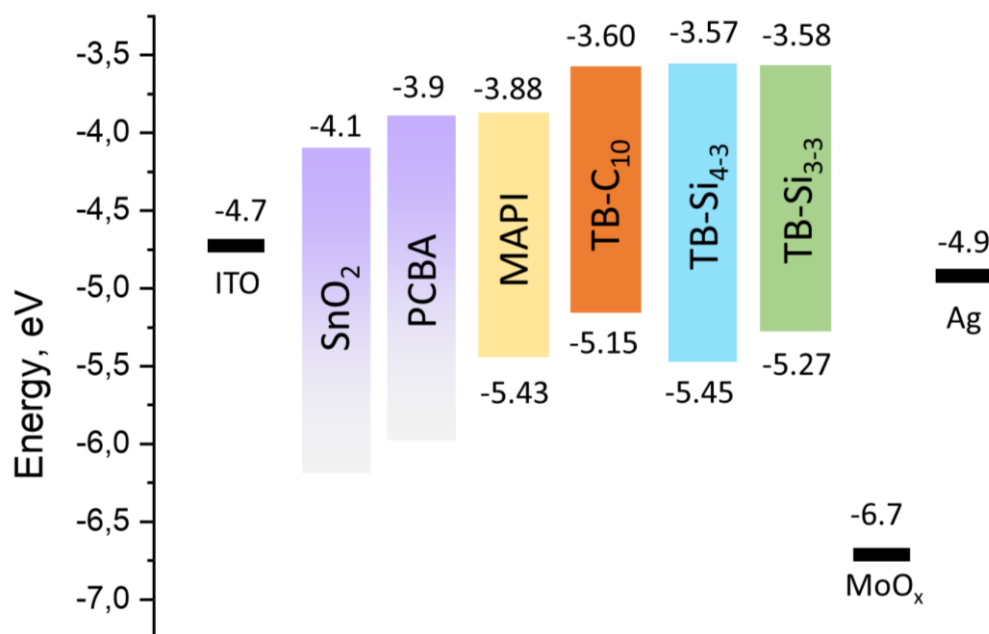

Figure S6. Energy level diagram of components of PSCs.

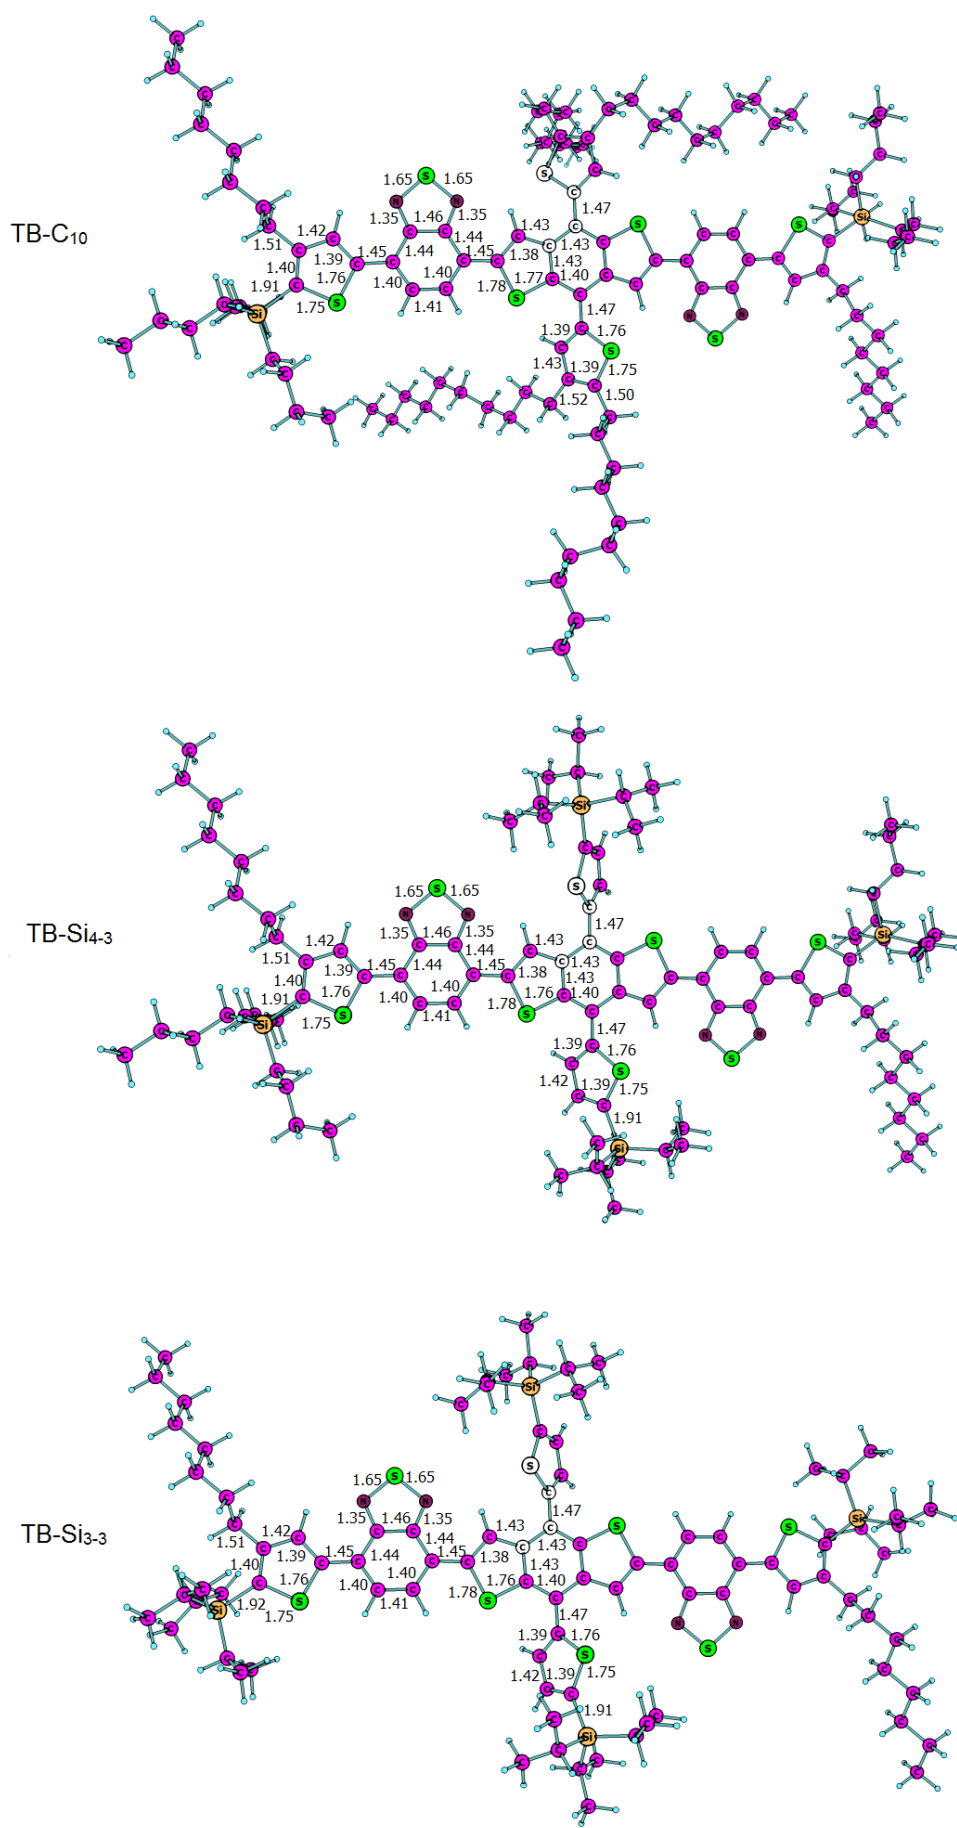

Figure S7. The optimized geometry of the TB-C<sub>10</sub>, TB-Si<sub>4</sub>-3, TB-Si<sub>3</sub>-3. Distances between atoms are indicated in Å.

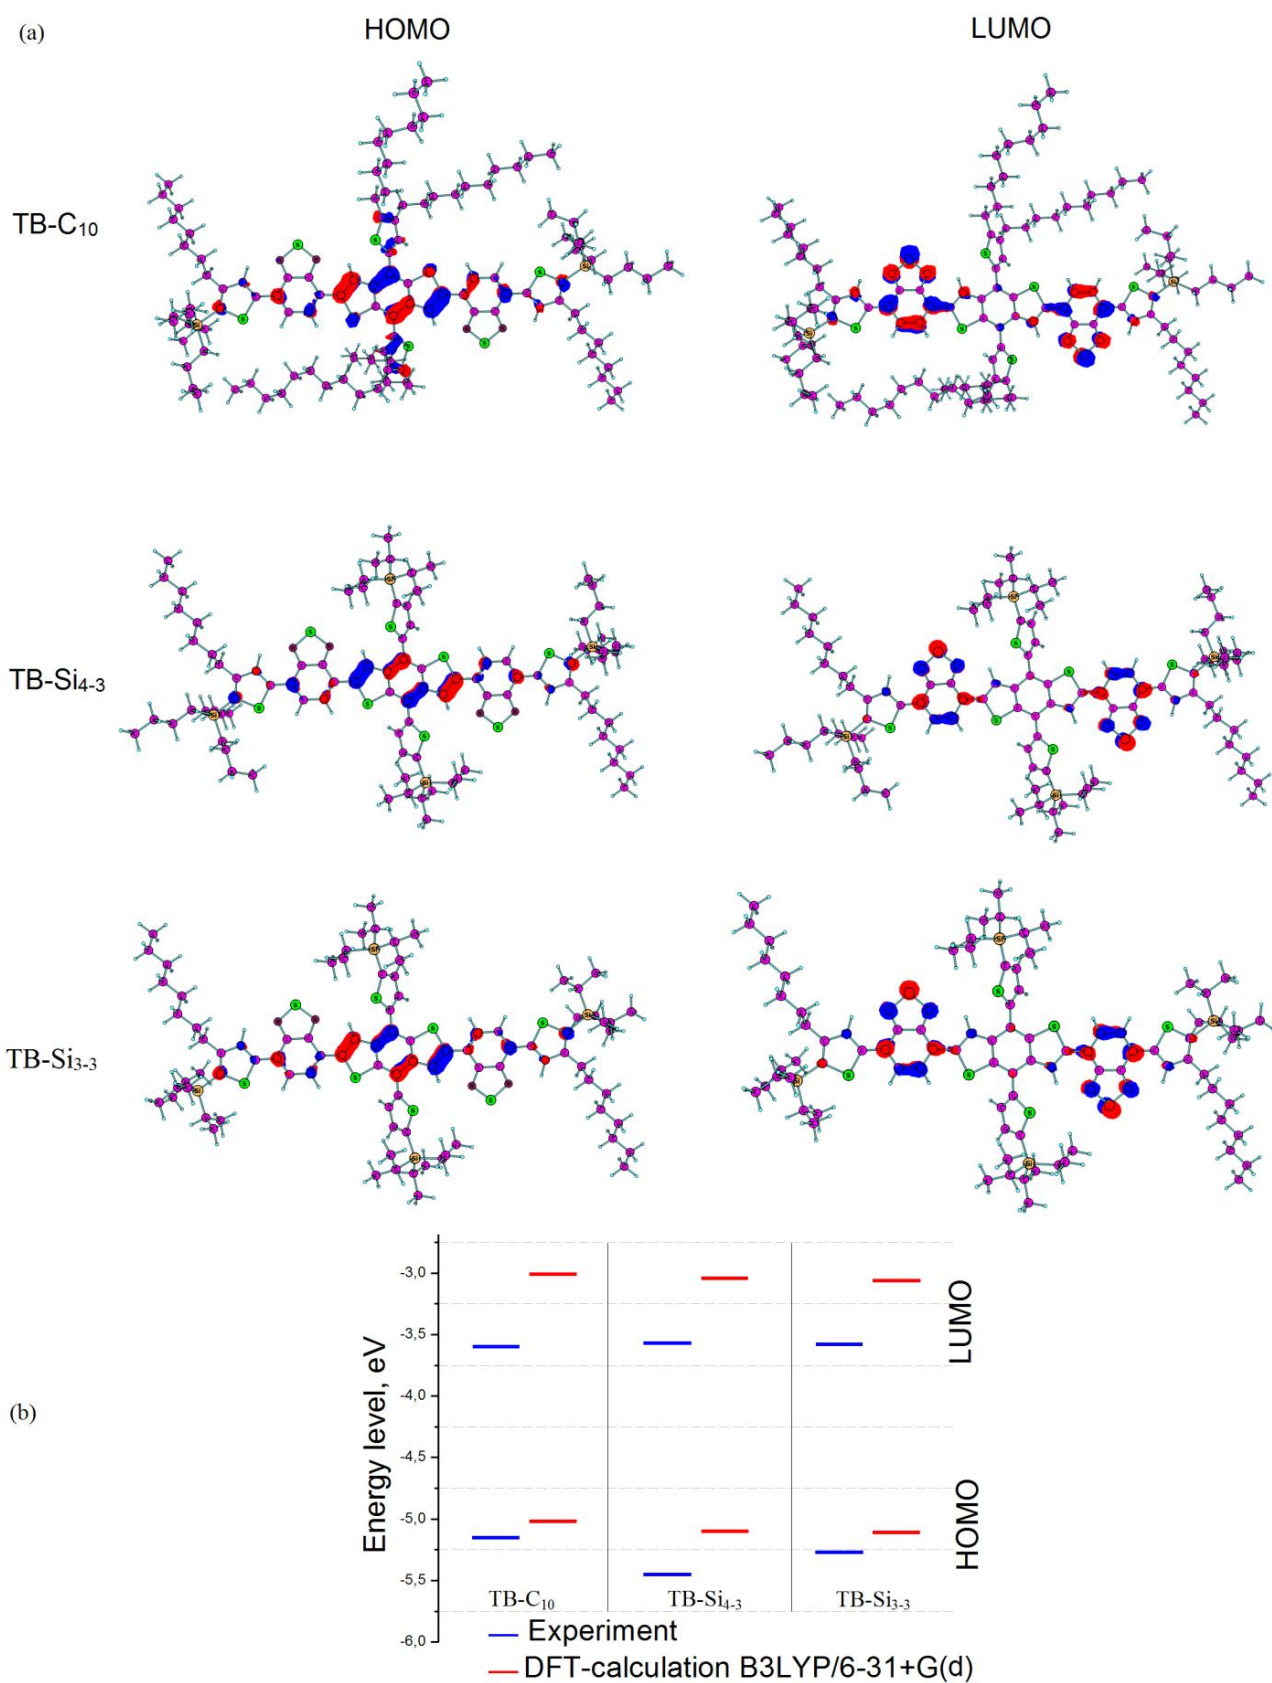

Figure S8. HOMO and LUMO distribution for **TB-C<sub>10</sub>**, **TB-Si<sub>4-3</sub>**, **TB-Si<sub>3-3</sub>** (a); and frontier molecular orbital energy levels as estimated from experiment and predicted by B3LYP/6-31+G(d) calculations (b).

Table S1. HOMO/LUMO energies and energy gaps ( $E_g$ ) for **TB-C<sub>10</sub>**, **TB-Si<sub>4-3</sub>**, **TB-Si<sub>3-3</sub>** calculated using the PBE/6-31+G(d) and B3LYP/6-31+G(d) approaches in comparison with experimental data.

|                            | HOMO/LUMO, eV     |                     |             | $E_g$ , eV        |                     |            |             |
|----------------------------|-------------------|---------------------|-------------|-------------------|---------------------|------------|-------------|
|                            | Calculation       |                     | Experiment  | Calculation       |                     | Experiment |             |
|                            | PBE/<br>6-31+G(d) | B3LYP/<br>6-31+G(d) |             | PBE/<br>6-31+G(d) | B3LYP/<br>6-31+G(d) | $E_g^{CV}$ | $E_g^{opt}$ |
| <b>TB-C<sub>10</sub></b>   | -4.49/-3.41       | -5.02/-3.01         | -5.15/-3.60 | 1.08              | 2.01                | 1.55       | 1.99        |
| <b>TB-Si<sub>4-3</sub></b> | -4.58/-3.45       | -5.10/-3.04         | -5.45/-3.57 | 1.13              | 2.06                | 1.88       | 2.05        |
| <b>TB-Si<sub>3-3</sub></b> | -4.60/-3.46       | -5.11/-3.06         | -5.27/-3.58 | 1.14              | 2.05                | 1.69       | 2.05        |

| HTM          | $V_{oc}$ , mV | $J_{sc}$ , mA $cm^{-2}$ | FF, % | PCE, %  |
|--------------|---------------|-------------------------|-------|---------|
| Spiro-OMeTAD | 910±60        | 16.1±0.5                | 46±10 | 7.0±2.0 |

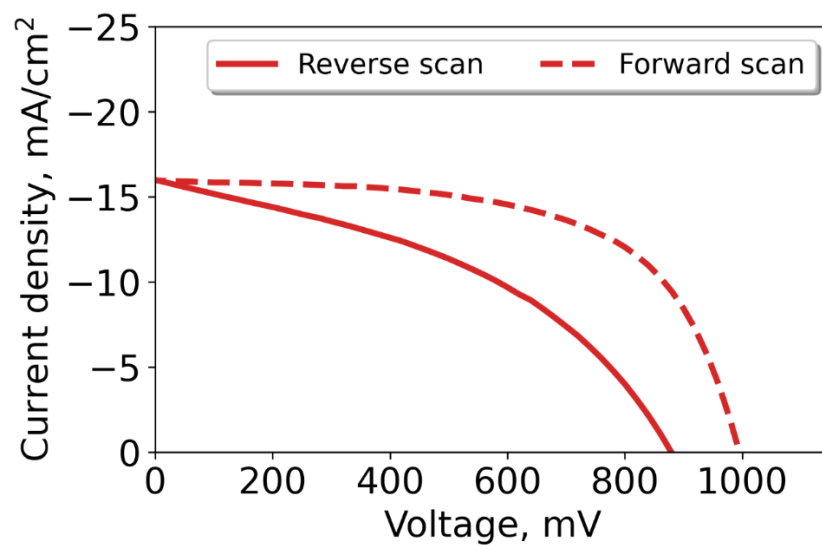

Figure S9. *J-V* curve for PSCs with non-doped spiro-OMeTAD as HTM.



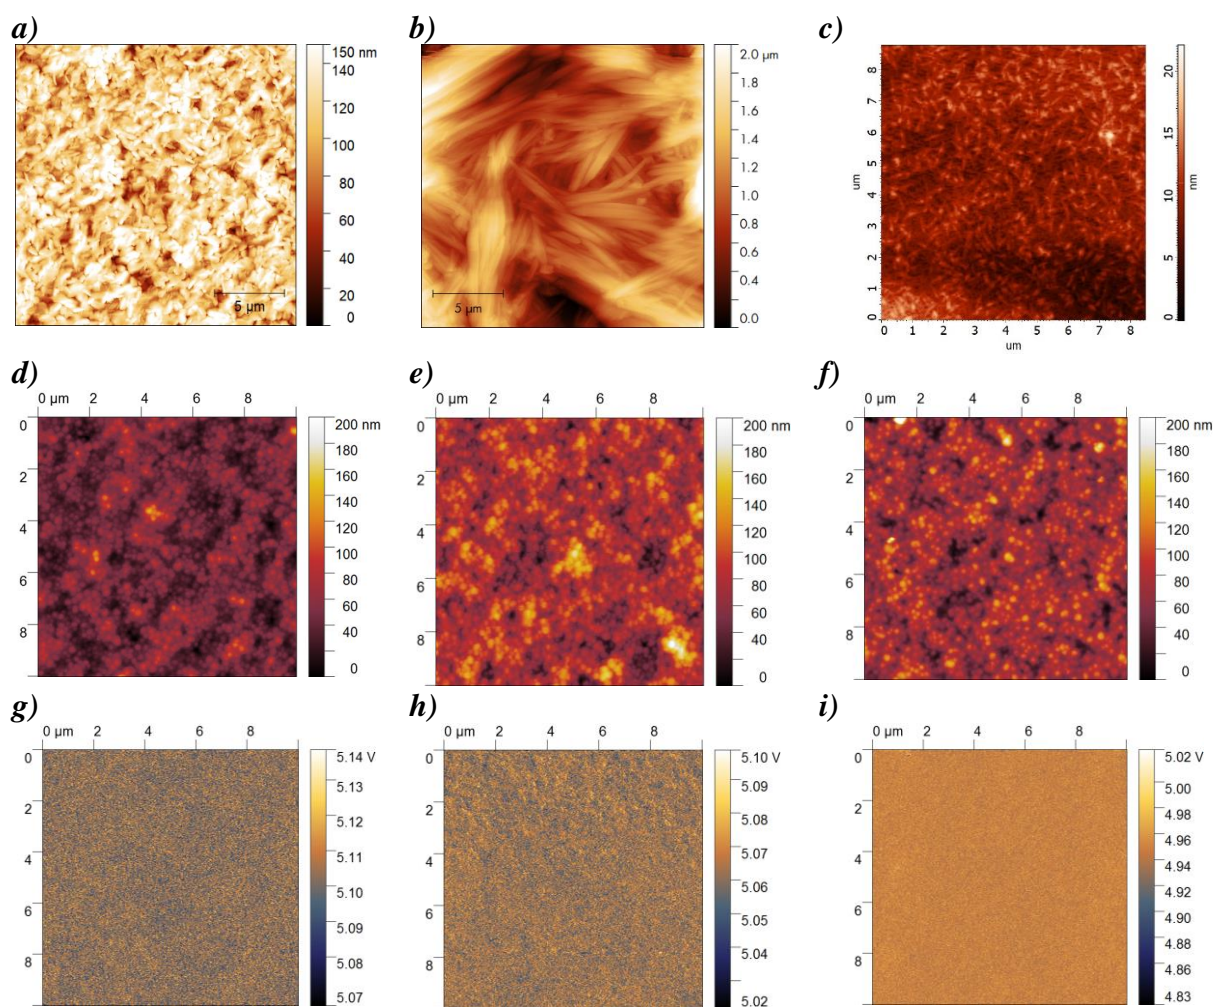

Figure S10. AFM images for thin films of **TB-C<sub>10</sub>** (a), **TB-Si<sub>4-3</sub>** (b) and **TB-Si<sub>3-3</sub>** (c) deposited from chlorobenzene. AFM (d, e, f) and surface potential images (g, h, i) of MAPbI<sub>3</sub>/TB-C<sub>10</sub>, MAPbI<sub>3</sub>/TB-Si<sub>4-3</sub>, MAPbI<sub>3</sub>/TB-Si<sub>3-3</sub>, respectively.

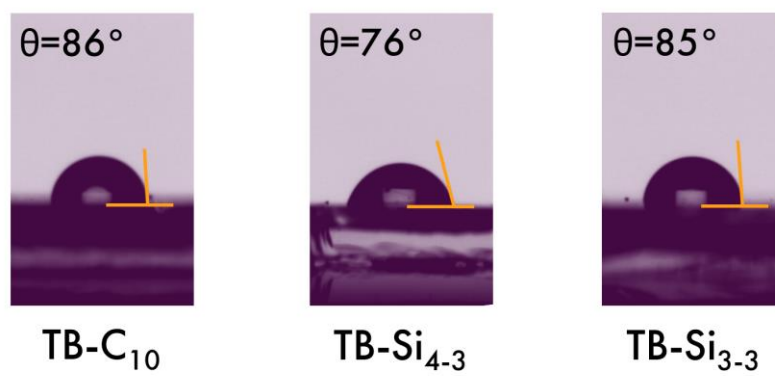

Figure S11. Contact angle of water on the surface of MAPbI<sub>3</sub>/HTMs.

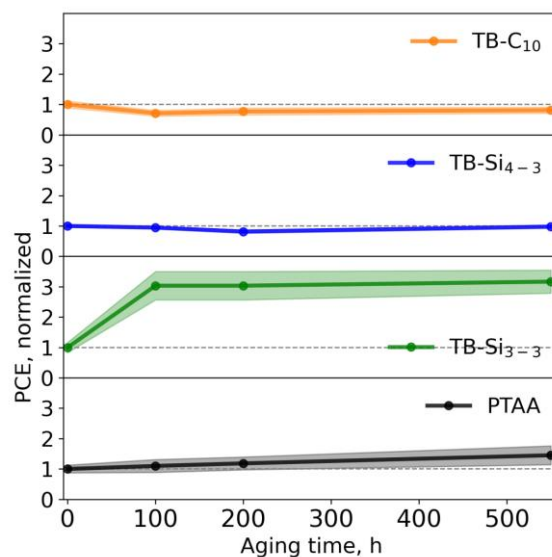

Figure S12. Evolution of relative power conversion efficiency of perovskite solar cells incorporating **TB-C<sub>10</sub>**, **TB-Si<sub>4-3</sub>**, **TB-Si<sub>3-3</sub>** and PTAA as HTMs.
